# Supplementary material for: CRISPR-Cas9-generated PTCHD1 2489T>G stem cells recapitulate patient phenotype when undergoing neural induction
Source: PubMed Central journal article supplement (PMC10787298; doi:10.1016/j.xhgg.2023.100257), 2023-11-24
Supplement: mmc1.pdf [file mmc1.pdf]

**HGGA, Volume 5**

**Supplemental information**

**CRISPR-Cas9-generated *PTCHD1* 2489T>G stem cells  
recapitulate patient phenotype  
when undergoing neural induction**

**Kathryn O. Farley, Catherine A. Forbes, Nicole C. Shaw, Emma Kuzminski, Michelle Ward, Gareth Baynam, Timo Lassmann, and Vanessa S. Fear**

Figure S1

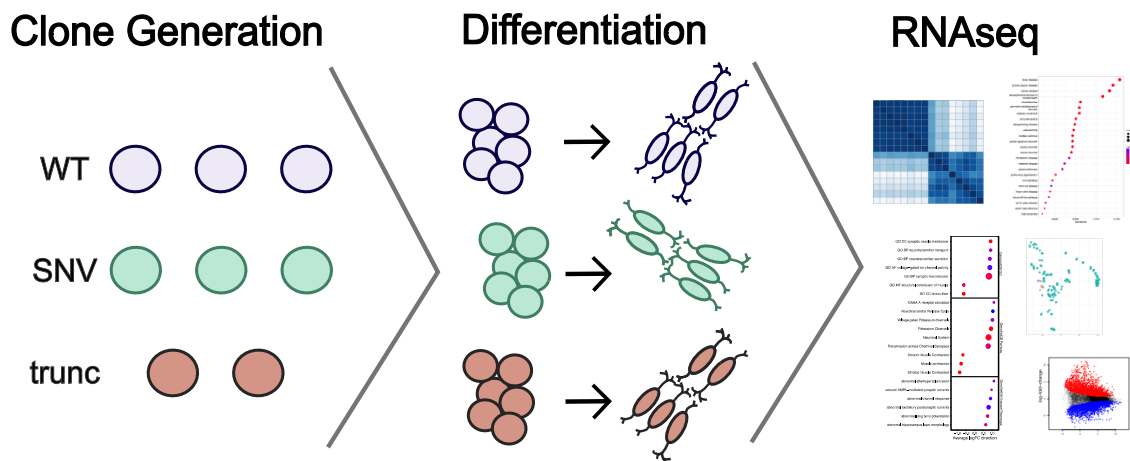

Experimental design. Three patient variant (SNV) iPSC clones were obtained using CRISPR/Cas9 gene editing and single cell cloning. Three experimentally matched wild-type clones, and two clones with truncating *PTCHD1* mutations were obtained. Obtained clones were differentiated to NPCs and RNAseq analysis completed.

**Figure S2**

**a**

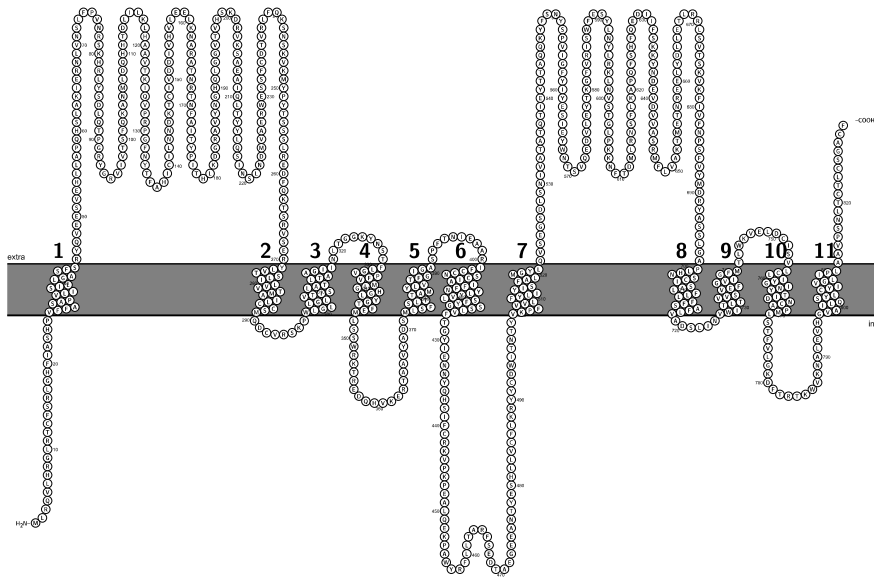

**b**

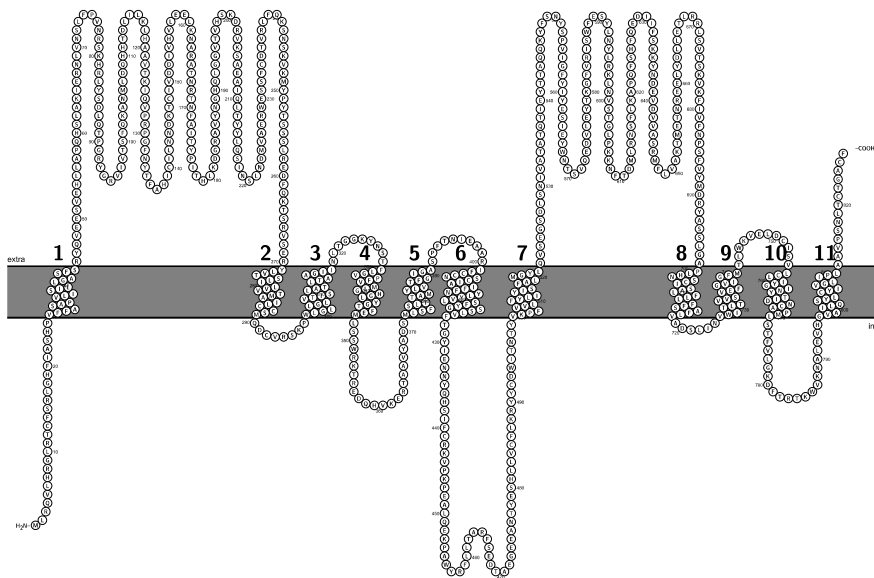

2D representations of the PTCHD1\_trunc clone primary protein structure as predicted by deepTHMM and visualised in Protter. Both clones were predicted to produce a premature stop codon, disrupting the final transmembrane domain.

**a** *PTCHD1\_trunc 1* NM\_173495.2(*PTCHD1\_i001*):p.(Leu827Alafs\*4)

**b** *PTCHD1\_trunc 2* NM\_173495.2(*PTCHD1\_i001*):p.(Leu823Glyfs\*5)

Figure S3

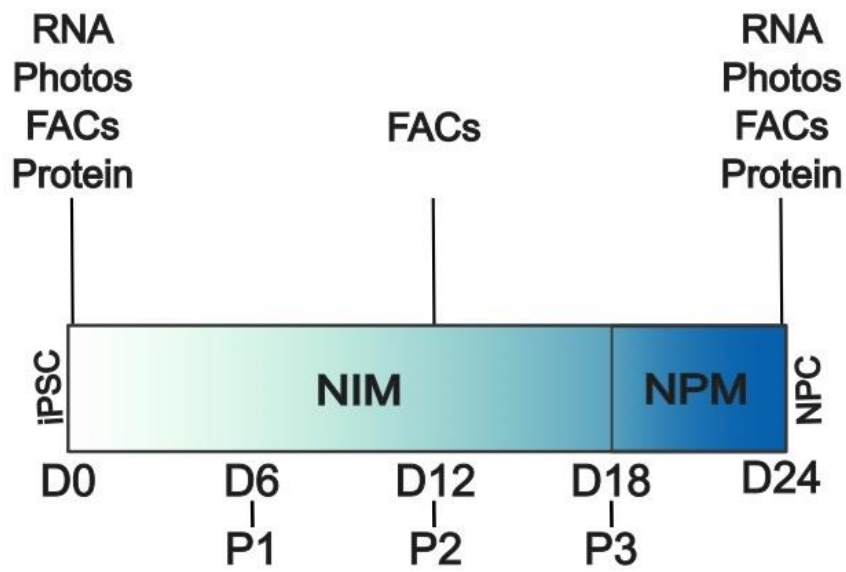

Generation of neural progenitor cells from iPSC clones. The three independent PTCHD1\_SNV, and three experimentally matched PTCHD1\_WT clones were differentiated to NPCs, with differentiation completed once for each pair. Additionally, PTCHD1\_trunc1 and PTCHD1\_trunc2 were experimentally matched to differentiation batches 1 and 2 respectively.

Figure S4

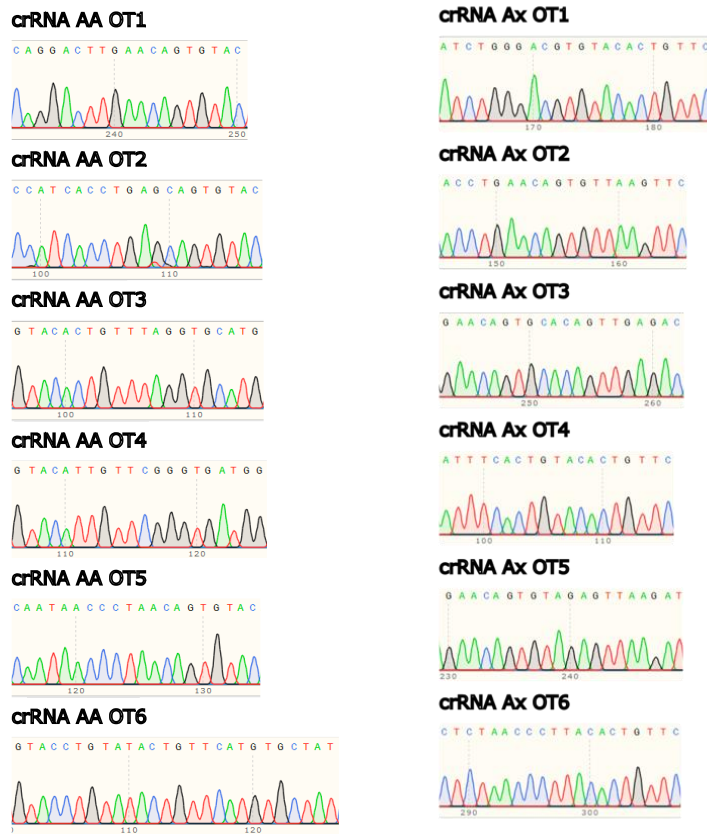

Off-target PCR chromatograms for crRNA AA and crRNA Ax. No off-target effects were found. Primer/target information can be viewed in supplementary table 3.

Figure S5

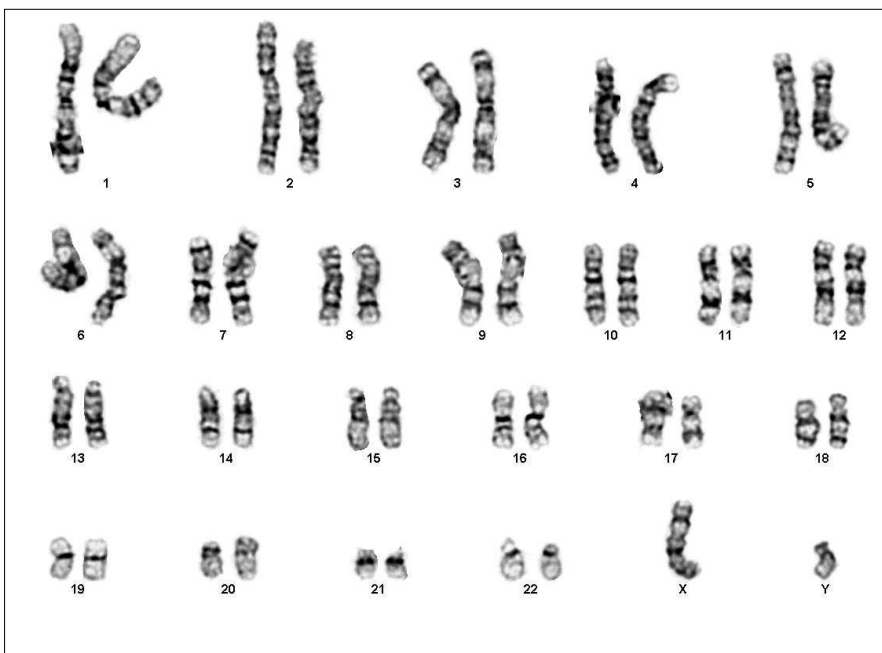

Karyotyping of KOLF2 cells containing *PTCHD1*\_SNV determined a 46, XY karyotype. Cells were karyotyped in the Cytogenetics section, Diagnostic Genomics, PathWest.

**Supplementary Figure 6.**

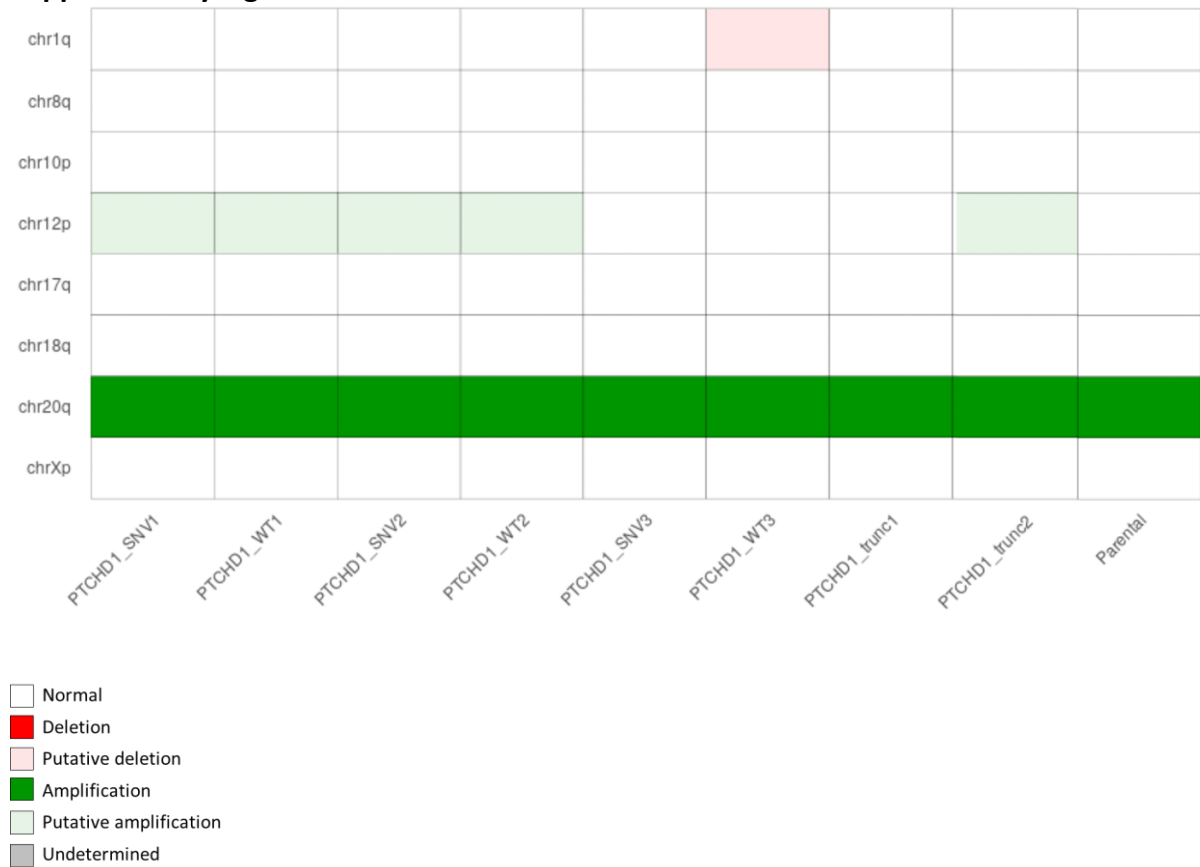

Karyotyping qPCR showed consistent karyotype amongst clones, including the parental KOLF-2 cell line.

**Figure S7**

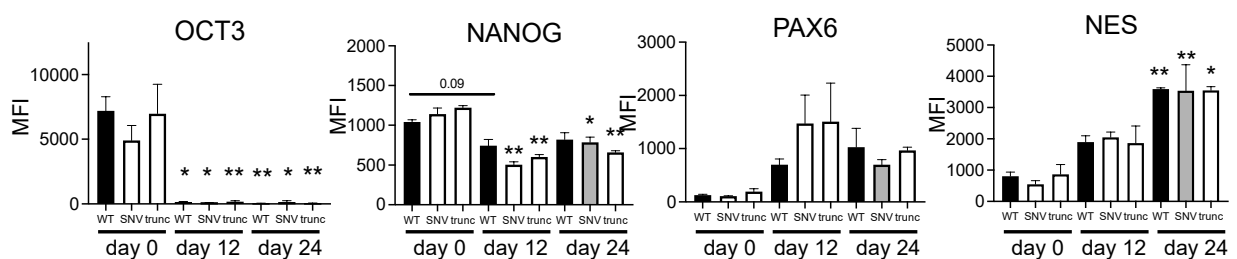

Neural differentiation, Geometric mean fluorescence intensity MFI, at indicated timepoints. \* $p < 0.05$ , \*\* $p < 0.01$  compared to respective day 0 sample, Ordinary one-way ANOVA with Sidaks Multiple comparison test.

Figure S8

a

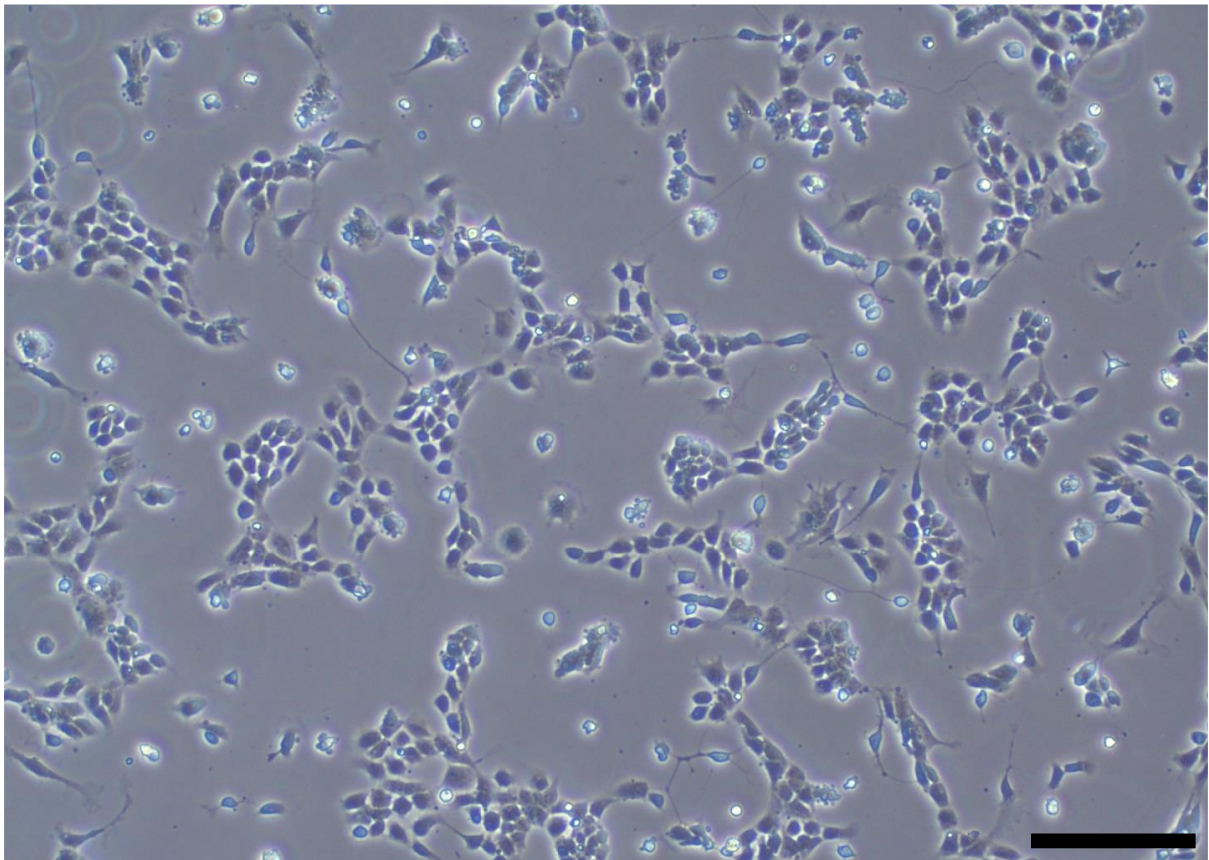

b

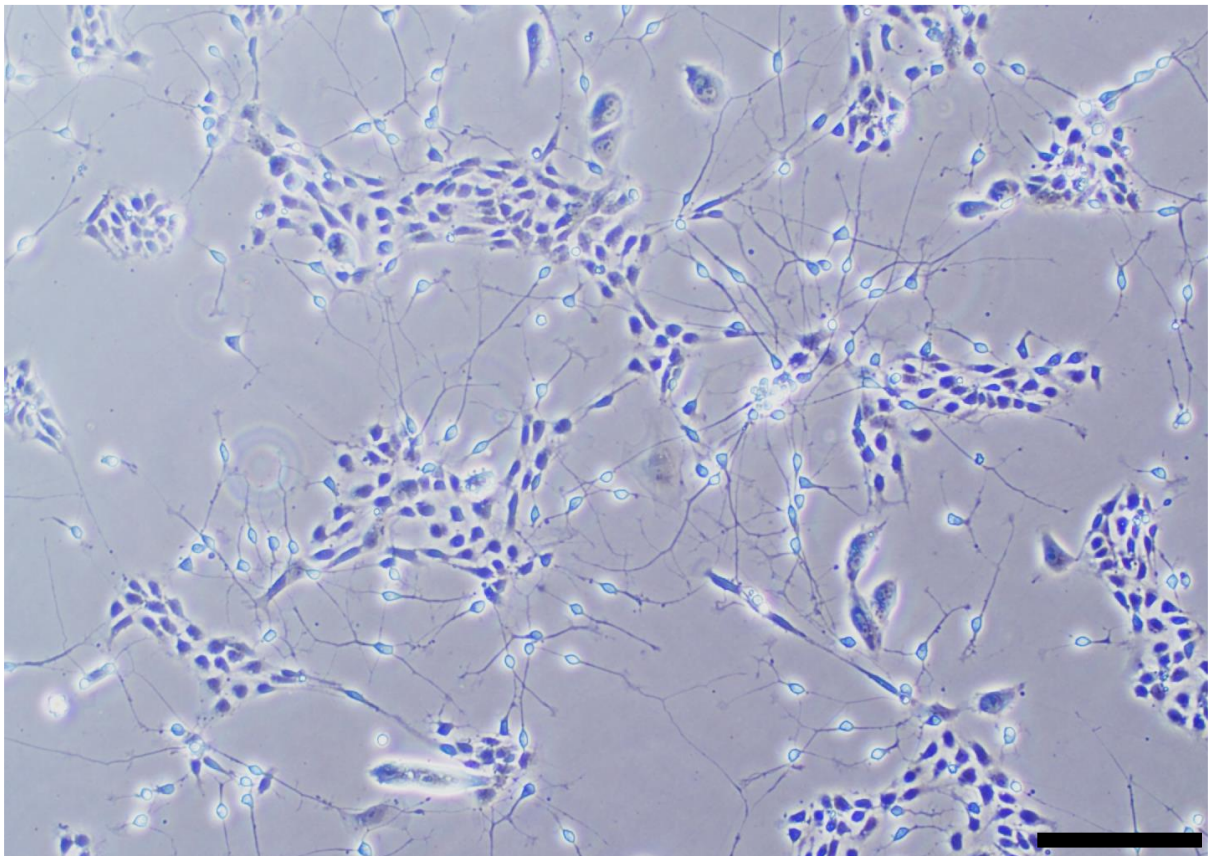

**c**

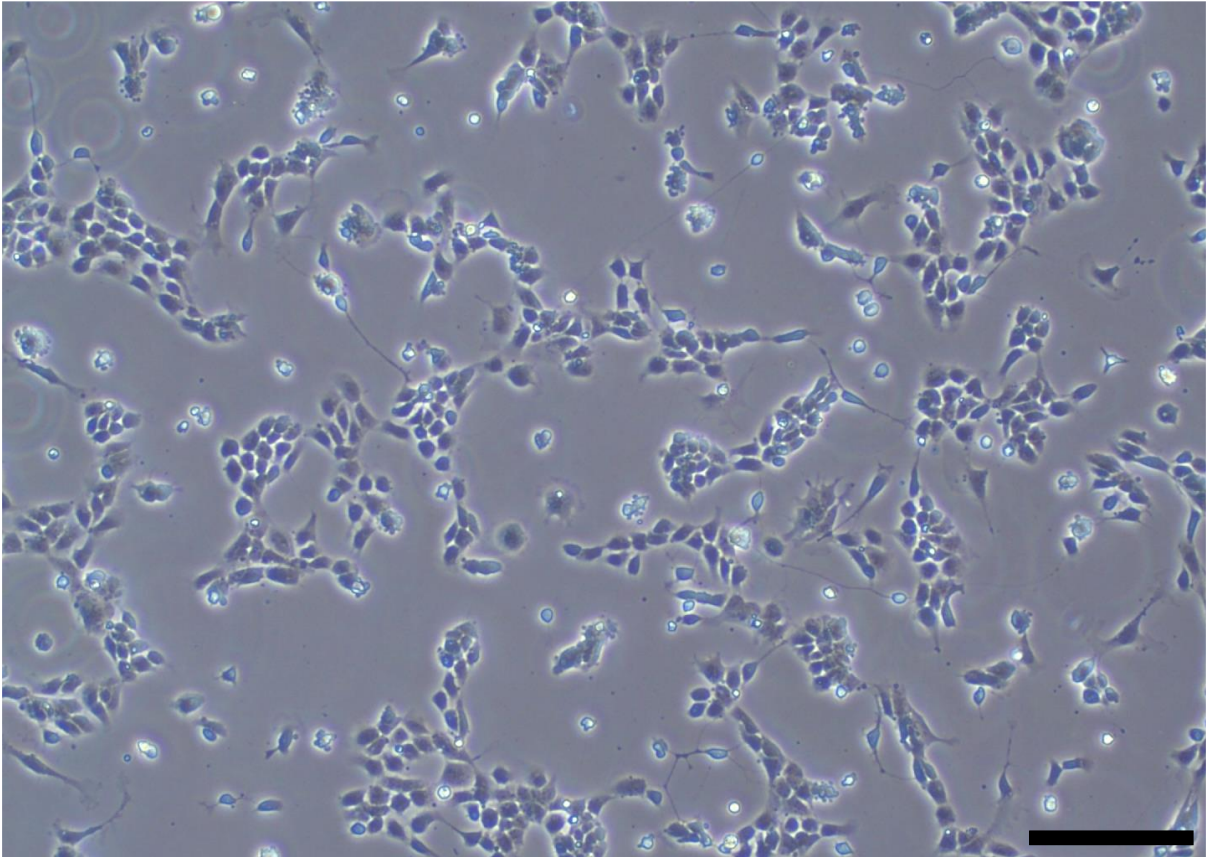

Light microscopy images of PTCHD1 clones at day 24 of neural induction. Black bar indicates 100 microns. **a** *PTCHD1\_WT* **b** *PTCHD1\_SNV* **c** *PTCHD1\_trunc*



**Figure S9**

**a.**

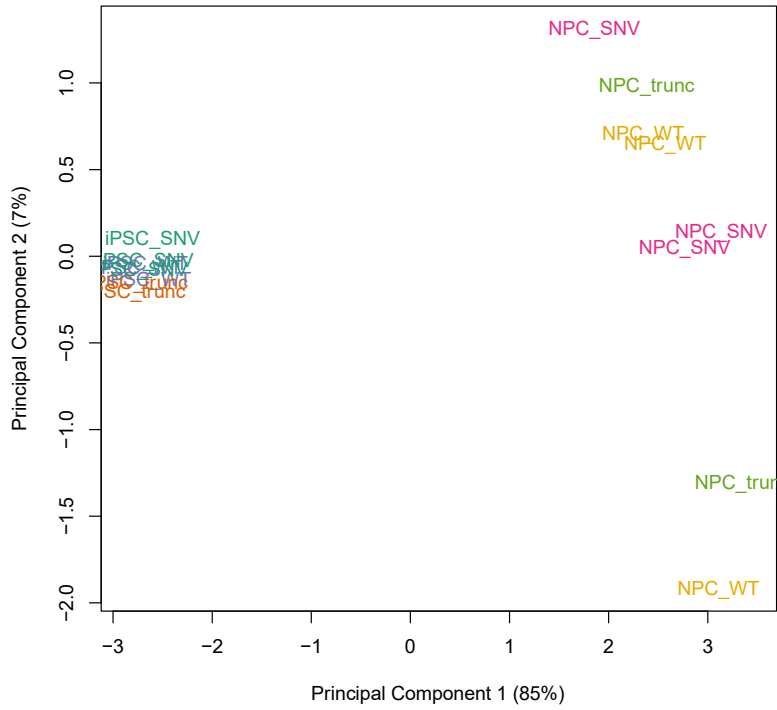

**b.**

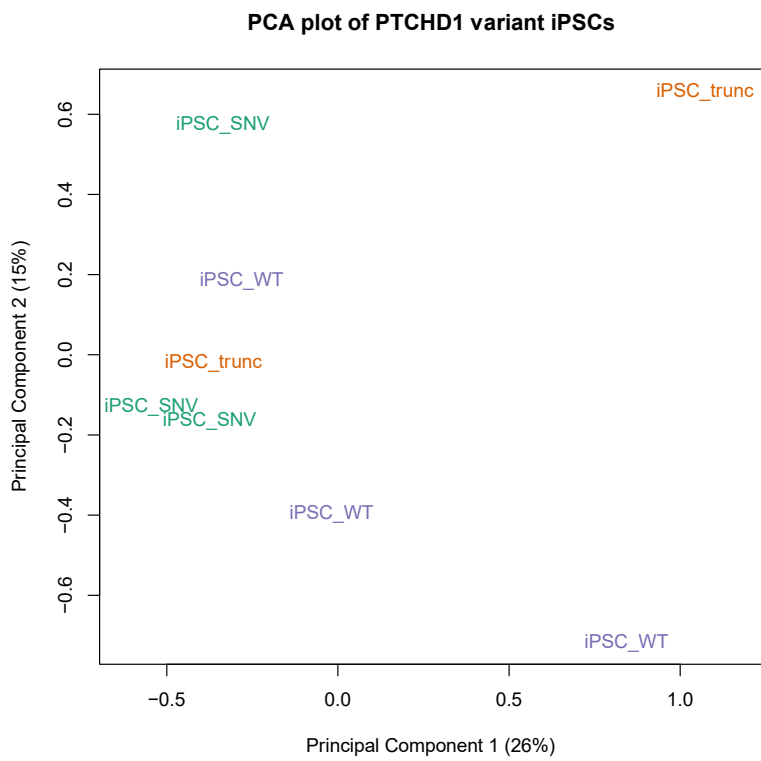

**c.**

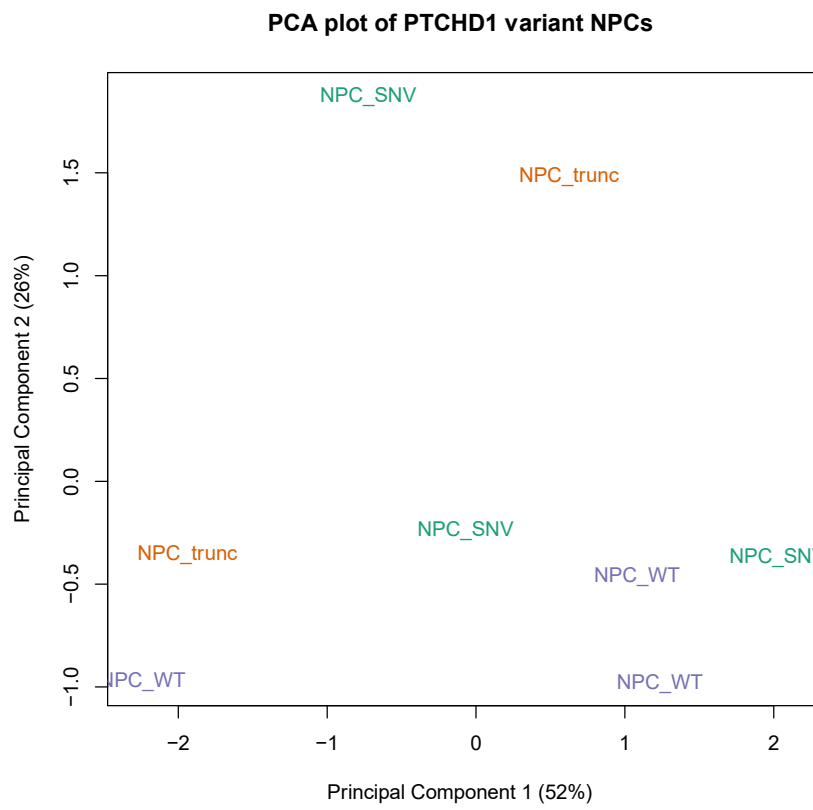

PCA plots show distances between gene expression profiles **a.** *PTCHD1\_WT*, *PTCHD1\_SNV*, and *PTCHD1\_trunc* showed clear separation of iPSCs and NPCs. **b.** iPSCs **c.** NPCs

**Figure S10**

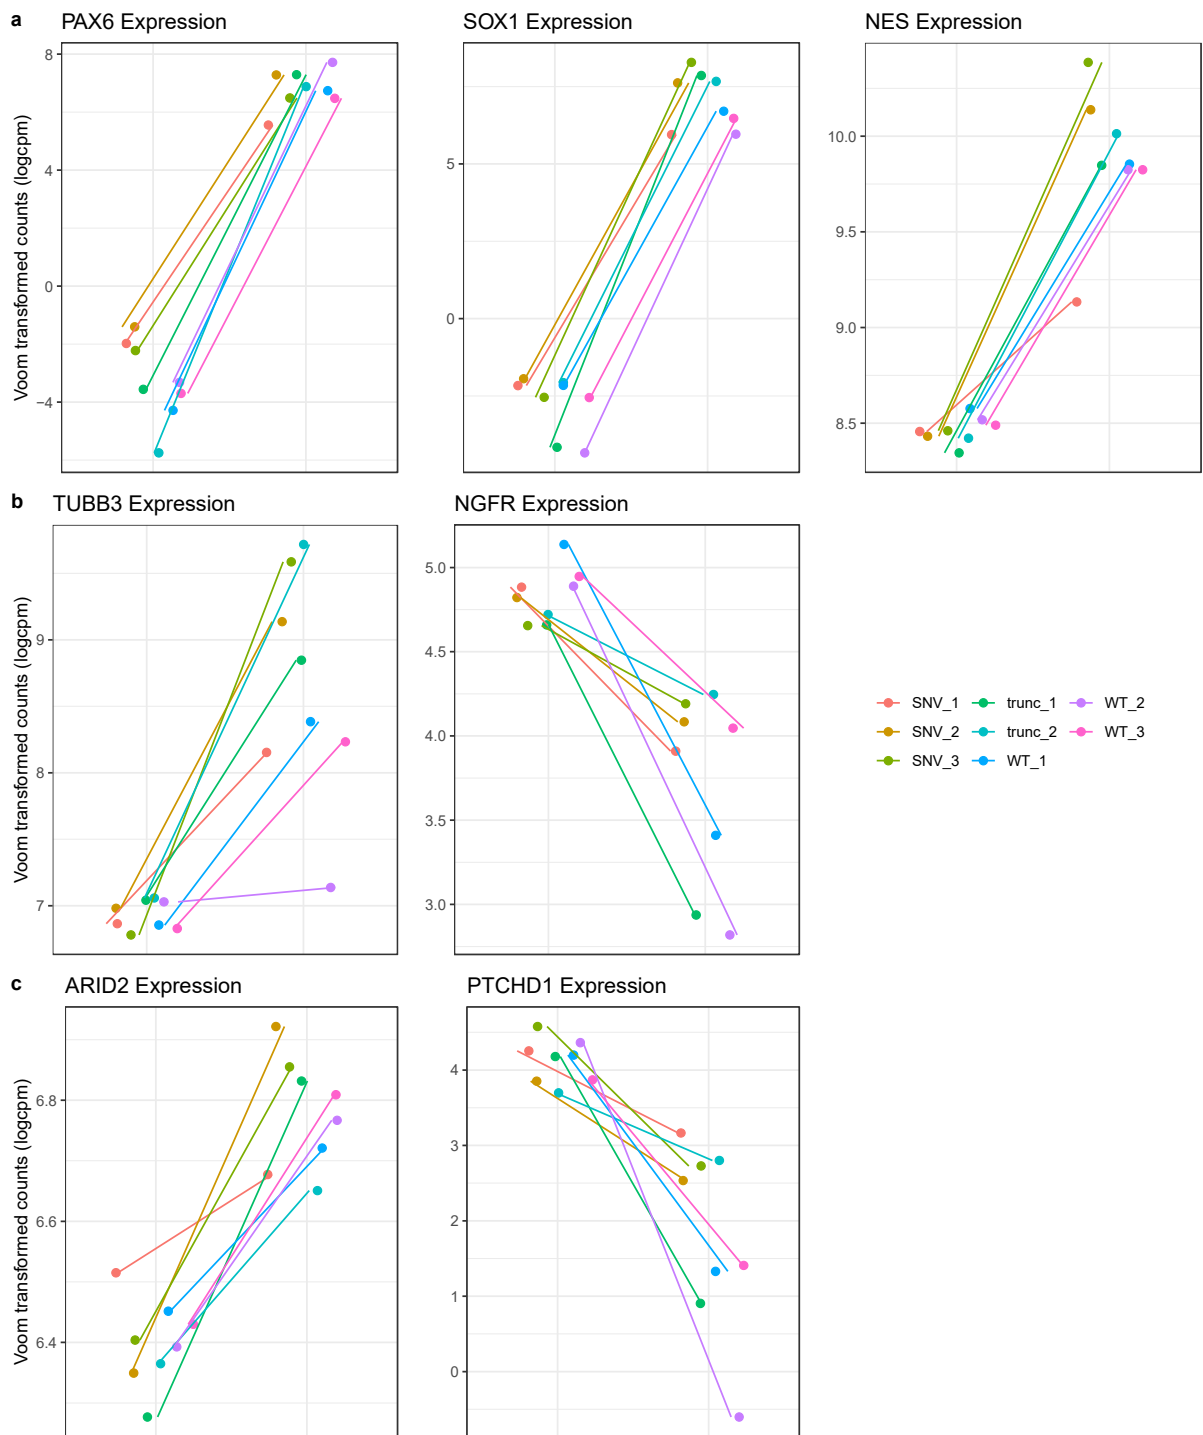

Marker/genes of interest expression

**a** NPC markers **b** mature neuron markers **c** genes of interest

Figure S11

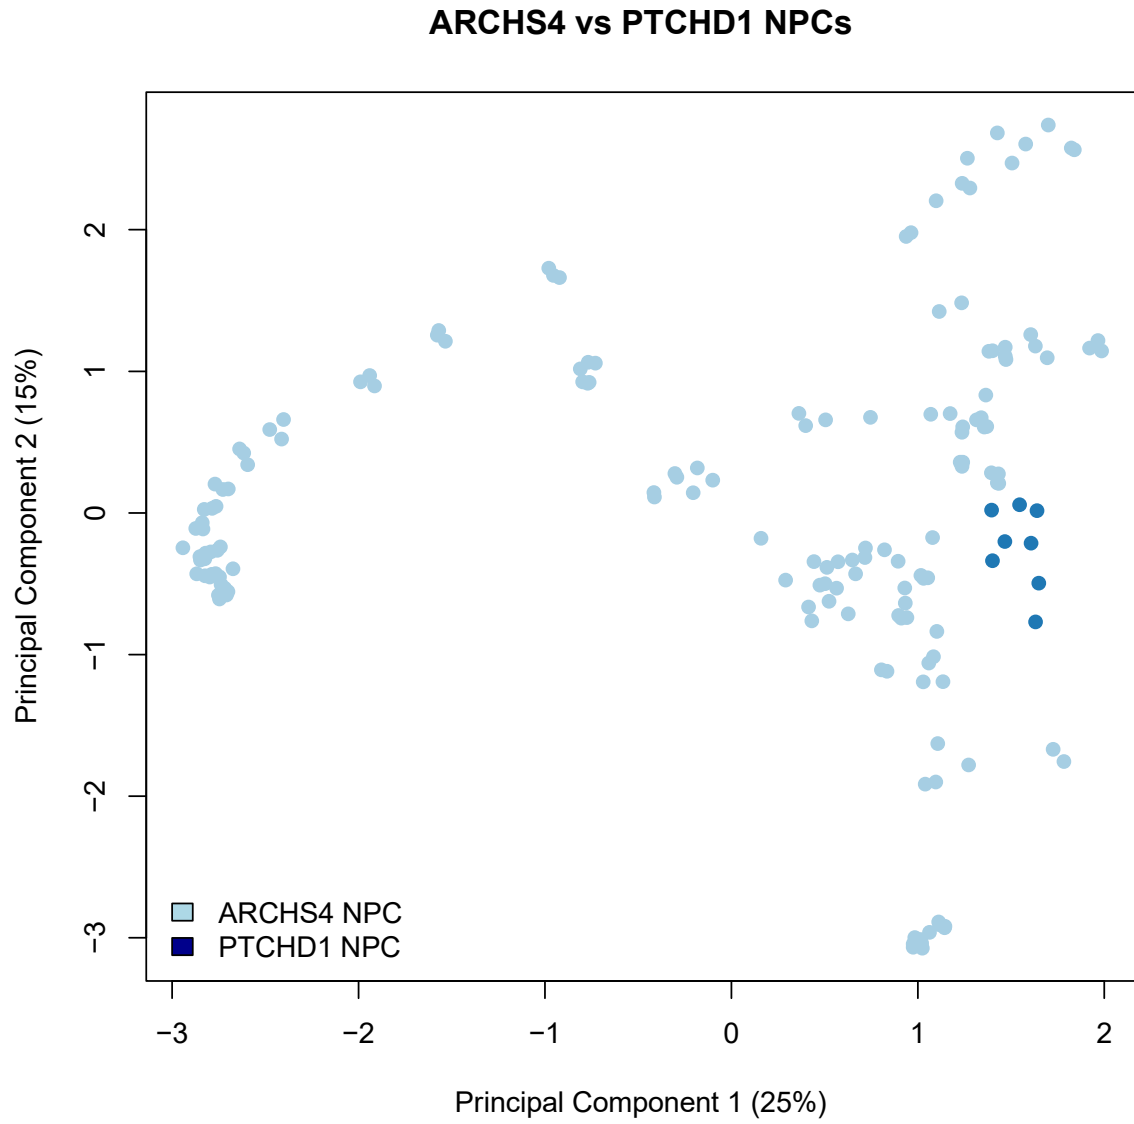

Principle component analysis of experimentally generated NPCs and wild-type NPCs in the ARCHS4 database.

Figure S12

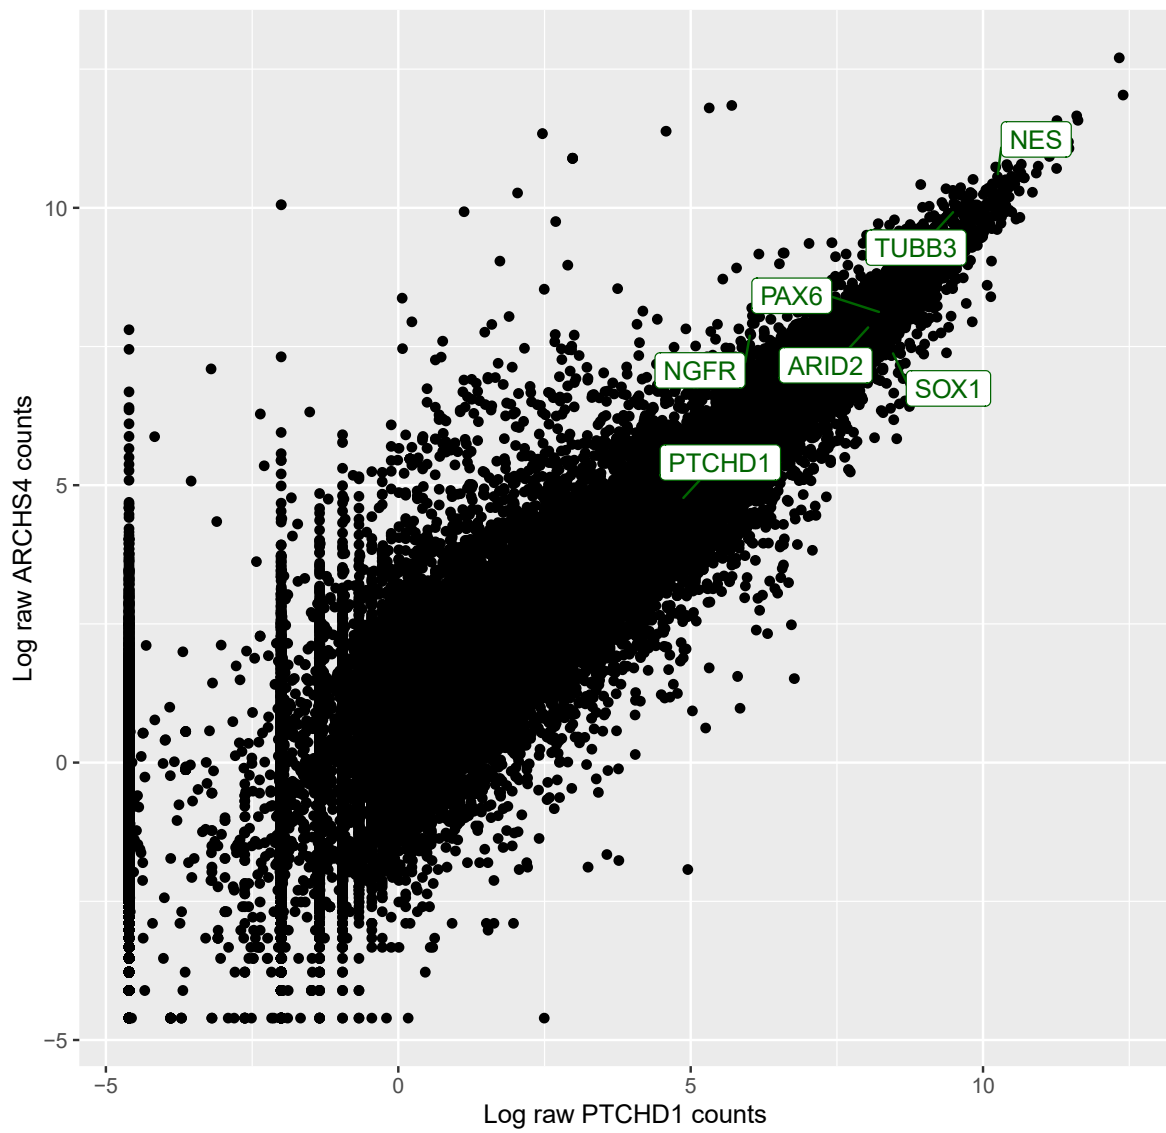

Dot plot of log-transformed mean raw counts for experimentally derived NPCs vs ARCHS4 wild-type NPCs.

**Figure S13**

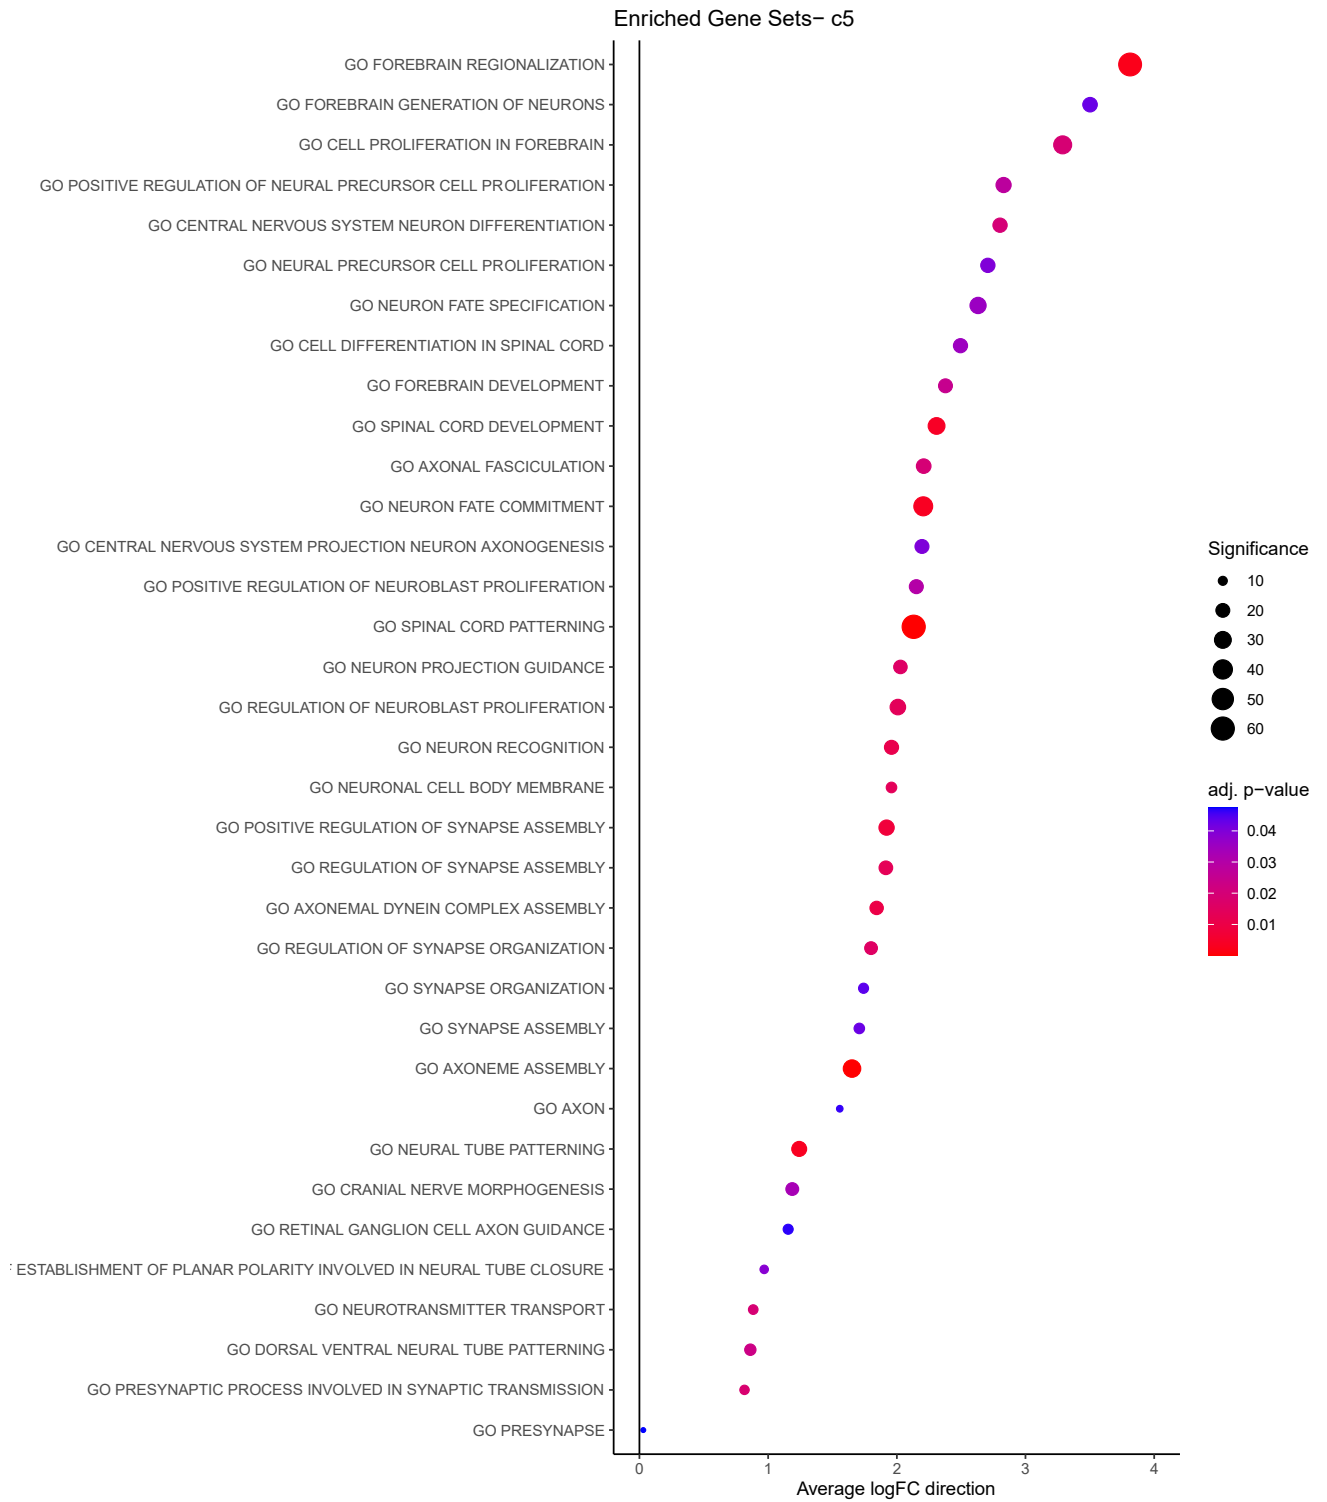

Gene sets commonly enriched during differentiation from the c5 Ontologies collection (GO and HPO)

Figure S14

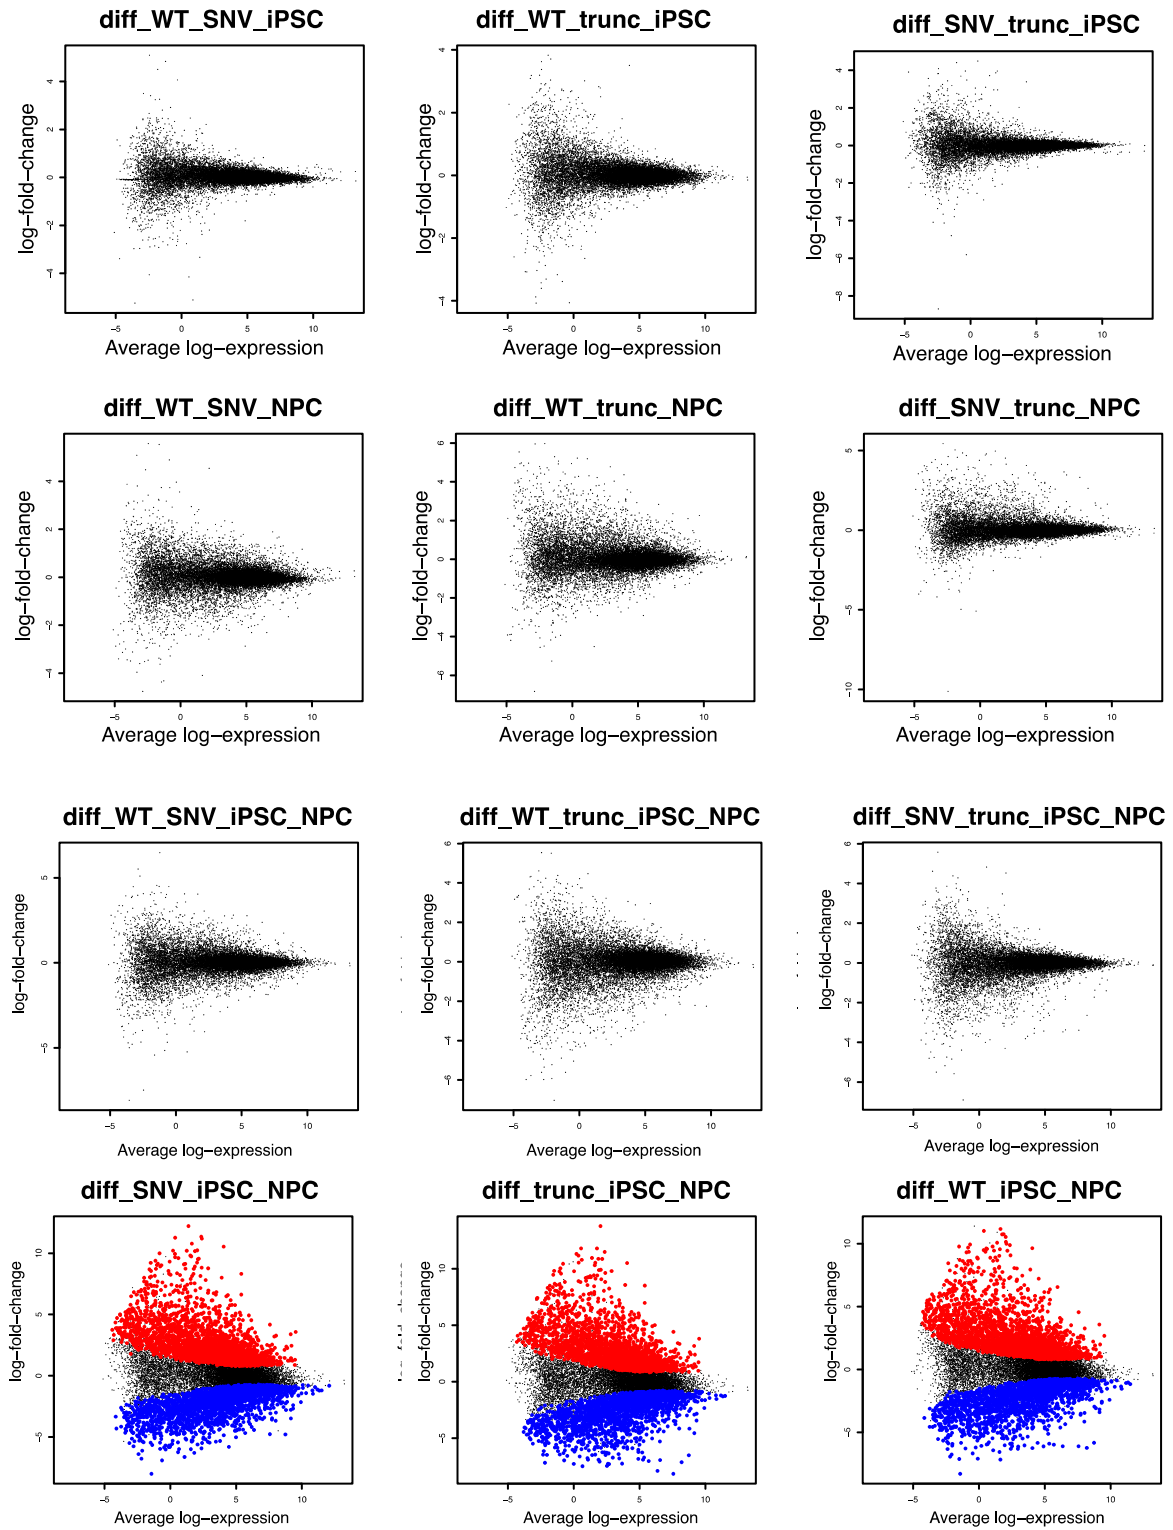

- NotSig
- Up
- Down

Mean-difference plots of *PTCHD1*\_SNV, trunc and WT iPSCs, NPCs, and during differentiation

Figure S15

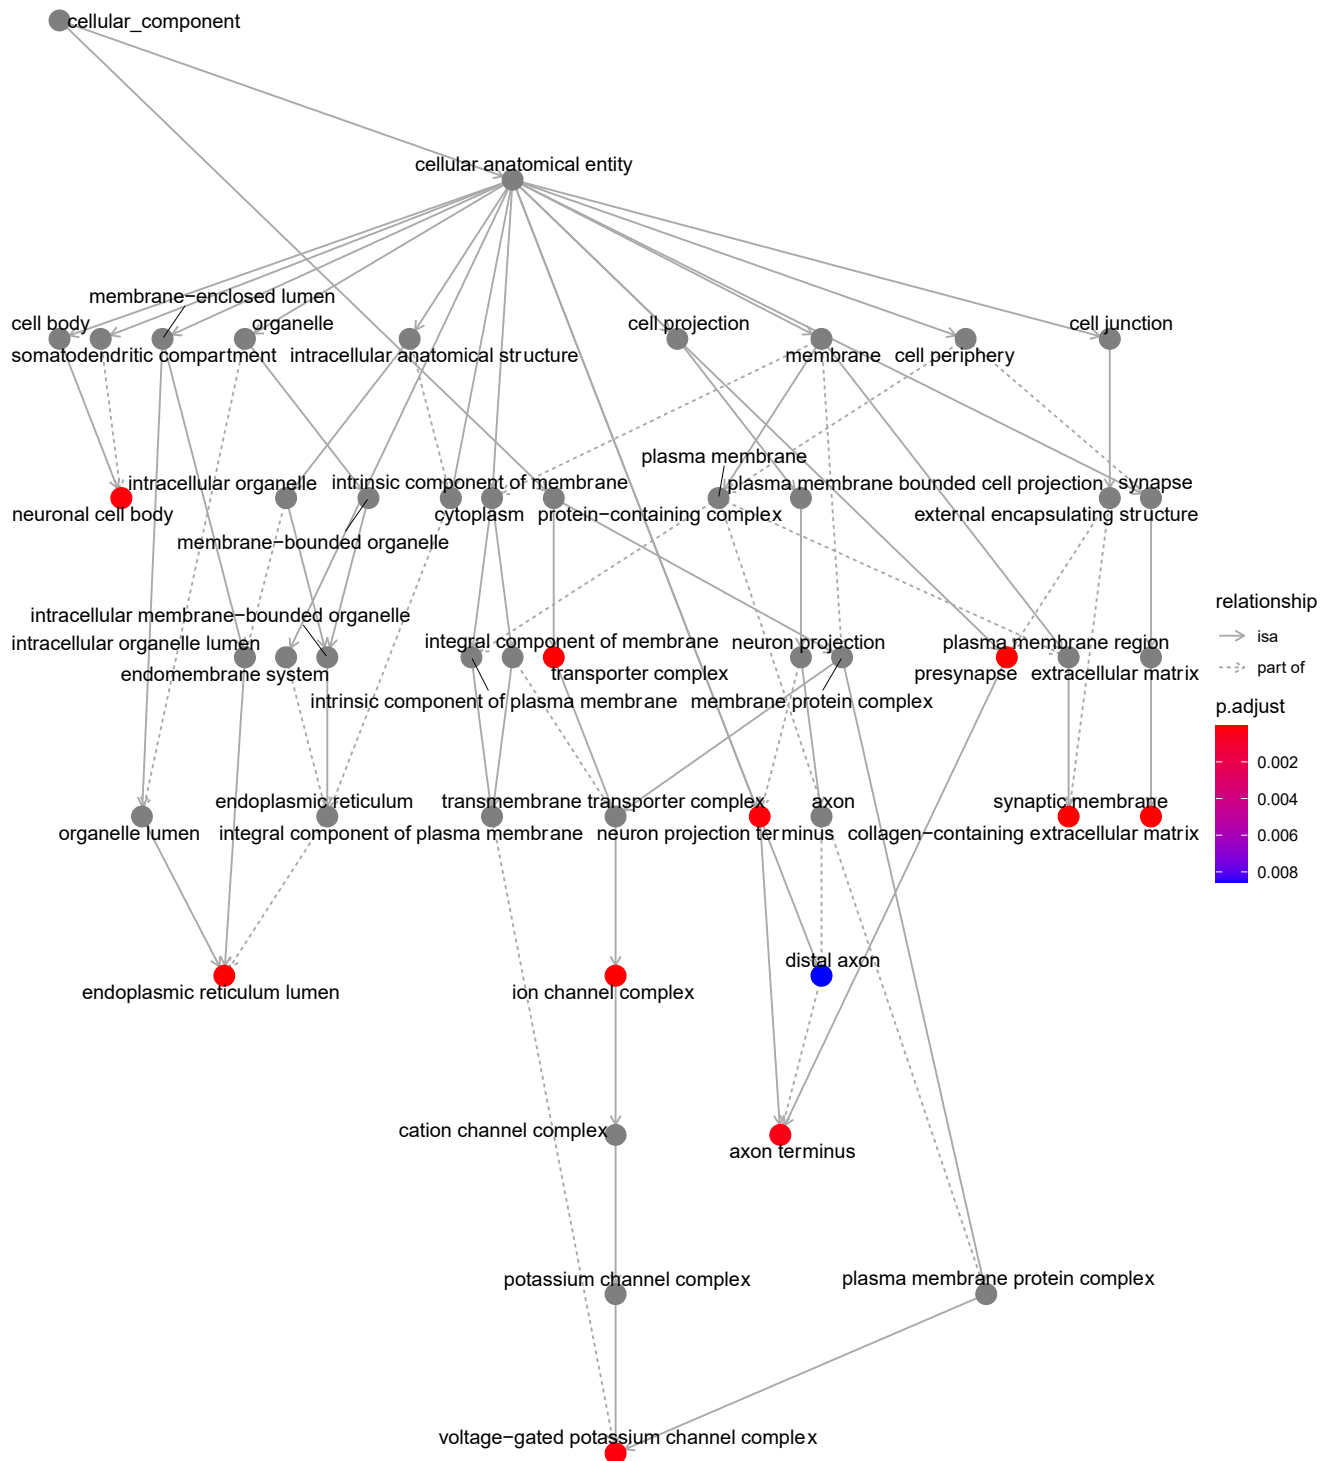

EnrichGO analysis identified synaptic cellular components were enriched in the comparison of *PTCHD1\_WT* to *PTCHD1\_SNV* cells during differentiation.



Figure S16

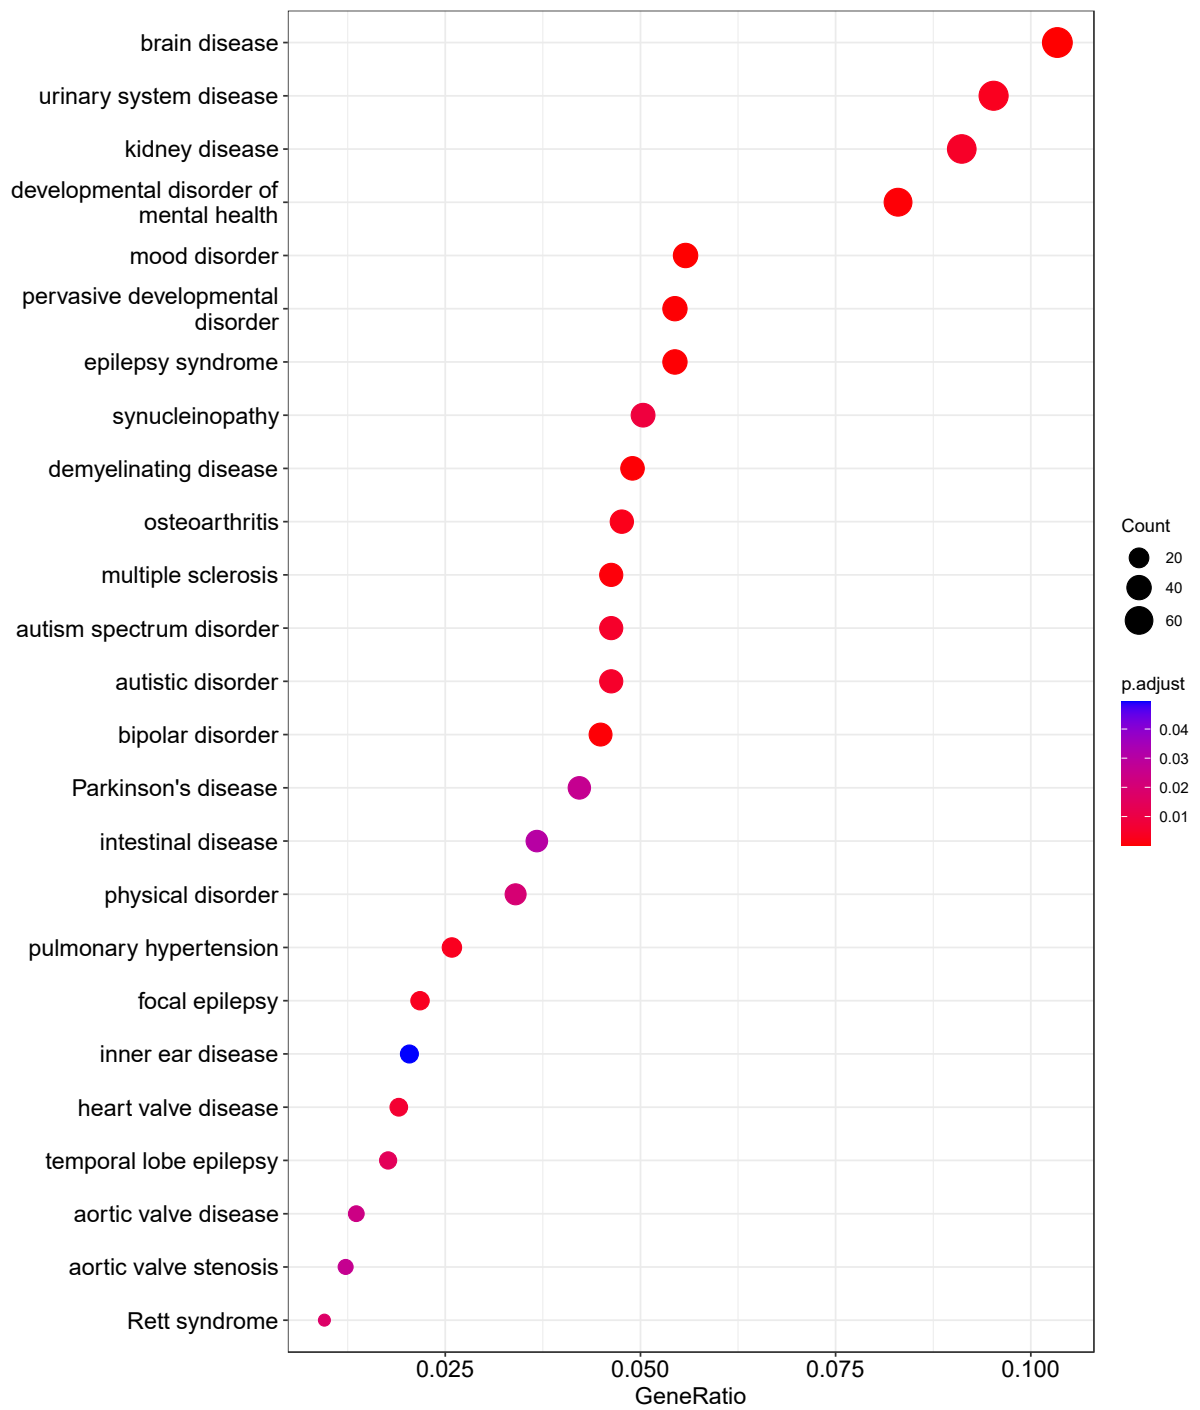

Enriched disease ontology terms from the comparison of *PTCHD1*\_WT to *PTCHD1*\_SNV cells during differentiation.

**Figure S17**

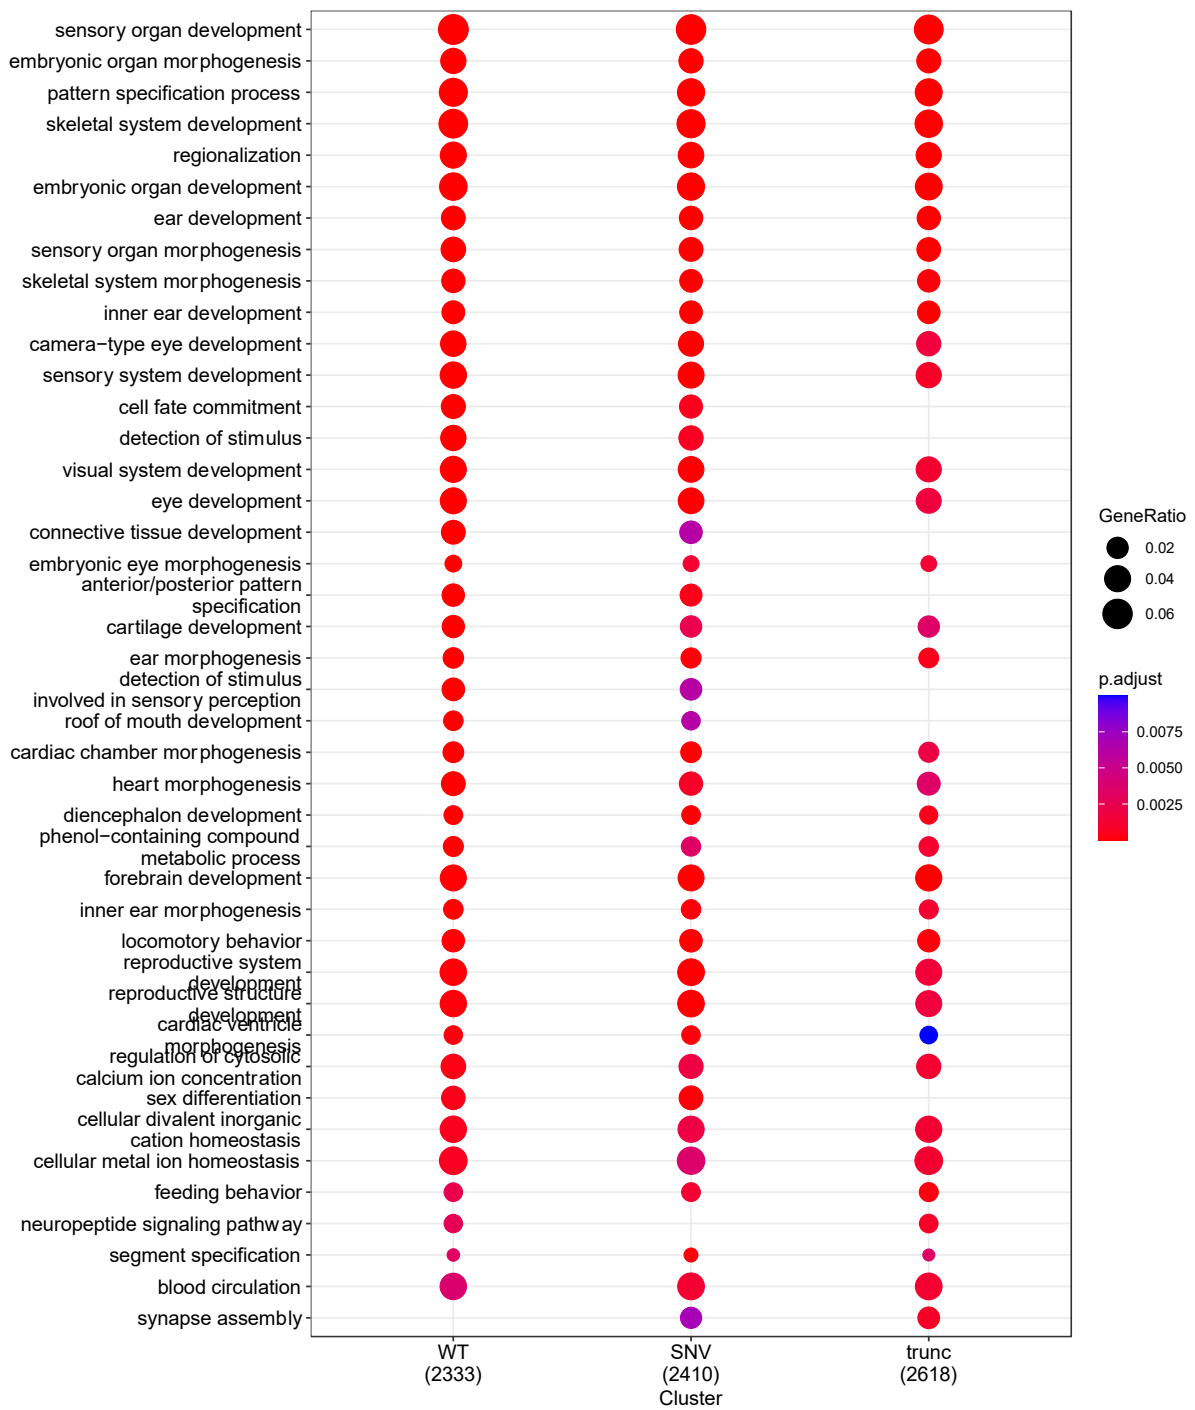

Clusterprofiler biological theme comparison of *PTCHD1*\_WT, *PTCHD1*\_SNV, and *PTCHD1*\_trunc cells during differentiation.

**Table S1**

Human Phenotype Ontology (HPO) terms for patient with a VUS in the PTCHD1 gene (NM\_173495 c.2489T>G (p.Ile830Arg]).).

| HPO term   | Description                              |
|------------|------------------------------------------|
| HP:0000729 | Autistic behavior                        |
| HP:0000343 | Long philtrum                            |
| HP:0000278 | Retrognathia                             |
| HP:0000463 | Anteverted nares                         |
| HP:0000276 | Long face                                |
| HP:0030799 | Scaphocephaly                            |
| HP:0008070 | Sparse hair                              |
| HP:0000954 | Single transverse palmar crease          |
| HP:0001263 | Global developmental delay               |
| HP:0012330 | <b>Pyelonephritis NOT</b>                |
| HP:0001250 | <b>Seizures NOT</b>                      |
| HP:0011398 | Central hypotonia                        |
| HP:0001317 | <b>Abnormality of the cerebellum NOT</b> |
| HP:0000666 | Horizontal Nystagmus                     |
| HP:0002194 | Delayed gross motor development          |
| HP:0001252 | Muscular hypotonia                       |

**Table S3:** Off-target sequences and primers and amplicon size for crRNAs used to introduce *PTCHD1*\_SNV to iPSCs

| Target          | Target sequence         | PAM | #MM | Locus            | F1                     | R1                       | Size  |
|-----------------|-------------------------|-----|-----|------------------|------------------------|--------------------------|-------|
| <b>crRNA_AA</b> | CAAGCACCTGAACAGTGTAC    | AGG | N/A | chrX:-23393979   |                        |                          |       |
| PTCHD1_AA_OT1   | C-AGGACTTGAACAGTGTAC    | TAG | 3   | chr15:+33294863  | AGCCCCATGATTCTGCCTAAC  | CGTCCATGCACCATTCAAGC     | 499bp |
| PTCHD1_AA_OT2   | CCATCACCTGAGCAGTGTAC    | AGG | 3   | chrX:+20921939   | TGTAAATGAACTGCAAGCATCT | GAATGAAAAACCAACATCGTAT   | 300bp |
| PTCHD1_AA_OT3*  | CATGCACCTAAACAGTGTAC    | AGG | 2   | chr5:-105802190  | ATCAAACCCCAGAAAGATGC   | TCTGAGTTGTATGGTTTTGGA    | 320bp |
| PTCHD1_AA_OT4   | CCATCACCCGAACAATGTAC    | AAG | 4   | chr2:-126352907  | TTTTAAATGGTTCCTGTGCAT  | GGTTGGATATTTGTCTCCTTGG   | 277bp |
| PTCHD1_AA_OT5   | CAATAACCCCTAACAGTGTAC   | AAG | 4   | chr5:+23920392   | TCCTCACTTACAAATGGGAGCT | GCCATAGTTTGCCAATCCCT     | 489bp |
| PTCHD1_AA_OT6*  | ATAGCACATGAACAGTATAC    | AGG | 4   | chr8:-3958051    | TGATCTACTTCTCAGGGCAGC  | TTTCTGCCTCCTTTTTGGTTTCC  | 491bp |
| <b>crRNA_Ax</b> | ATCTGACCTGTACTACTGTTC   | AGG | N/A | chrX:+23393970   |                        |                          |       |
| crRNA_Ax_OT1    | ATCTGGGACGTGTACTACTGTTC | CAG | 3   | chr3:+114957866  | TTCATCGTGACAACCACACA   | TCCCTGAAAAGGGAGCTTGAC    | 488bp |
| crRNA_Ax_OT2    | ACCTGAACTTAACACTGTTC    | AGG | 4   | chr11:-45192673  | ATGAACCAGTTCTGGCTGGAG  | CAGTGACACATCATCAACTATCCC | 421bp |
| crRNA_Ax_OT3*   | GTCTCAACTGTGCACTGTTC    | CAG | 4   | chr13:-112440782 | AAGATTGAGAGCCACACCCC   | TGGTGTCTGACACGTATTC      | 403bp |
| crRNA_Ax_OT4    | ATTTCA-CTGTACTACTGTTC   | TAG | 3   | chr2:+158899895  | CCATGTAAGGCCTGCATCTT   | TGGGCACAGTTCTACCATGT     | 308bp |
| crRNA_Ax_OT5*   | ATCTTAACTCTACTACTGTTC   | TAG | 3   | chr8:-98902909   | ATCACCCCTGAGCCCTCCATA  | GATGGTGCTAAAGAGGCGGT     | 412bp |
| crRNA_Ax_OT6    | CTCTAACCCCTTACTACTGTTC  | AAG | 4   | chr11:-108314619 | ACCCAGCCCATGTACAGTTT   | GCCTAAAGTACATATCAACCAGC  | 559bp |

**Table S14:** PTCHD1 patient variant of uncertain significance and in silico predictions of pathogenicity

| <b>Mutation</b>     | <b>SIFT</b> <sup>1</sup> | <b>Polyphen 2 (Humdiv)</b> <sup>2</sup> | <b>FATHMM</b> <sup>3</sup> | <b>Residue Conservation Score</b> <sup>4,5</sup> |
|---------------------|--------------------------|-----------------------------------------|----------------------------|--------------------------------------------------|
| <b>PTCHD1 I830R</b> | Not tolerated            | Possibly damaging                       | Damaging                   | 66                                               |

<sup>1</sup> <https://sift.bii.a-star.edu.sg/>

<sup>2</sup> <http://genetics.bwh.harvard.edu/pph2/>

<sup>3</sup> <https://fathmm.biocompute.org.uk/>

<sup>4</sup> <https://pubmed.ncbi.nlm.nih.gov/11093265/>

<sup>5</sup> <https://pubmed.ncbi.nlm.nih.gov/12112692/>
